# Supplementary material for: A monometallic tri-spin single-molecule magnet based on rare earth radicals
Source: Royal Society of Chemistry journal article supplement (doi:10.1039/b908639k), 2009-01-01
Supplement: b908639k.pdf [file b908639k.pdf]

## Electronic Supplementary Information

### A Monometallic Tri-Spin Single-Molecule Magnet Based on Rare-Earth-Radical

Na Zhou, Yue Ma, Chao Wang, Gong-Feng Xu, Jin-Kui Tang, Jin-Xia Xu,  
Shi-Ping Yan, Peng Cheng, Li-Cun Li, and Dai-Zheng Liao\*

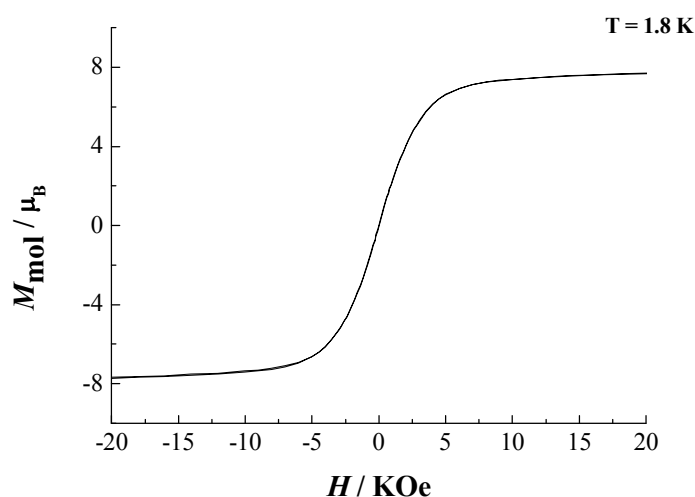

**Fig. S1** Magnetization curve versus applied field measured at 1.80 K. It did not exhibit a hysteresis effect under our experimental conditions.

#### Experimental

##### IR Spectra

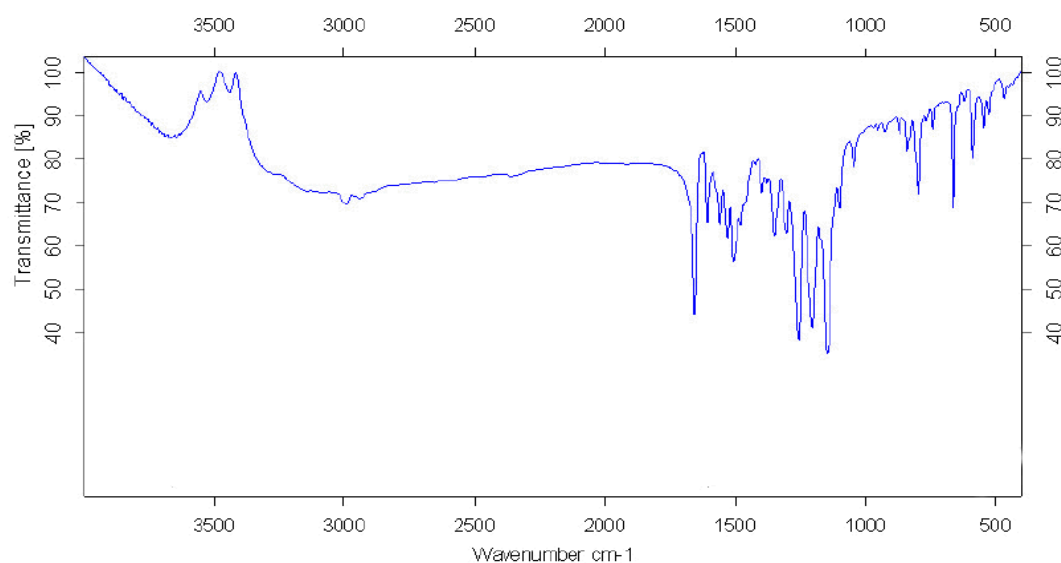

**Fig. S2** The IR spectra of complex of **2**
